# Supplementary material
Source: PubMed Central journal article supplement (PMC4704183)
Supplement: AAC.01528-15_zac001164759so1.pdf [file AAC.01528-15_zac001164759so1.pdf]

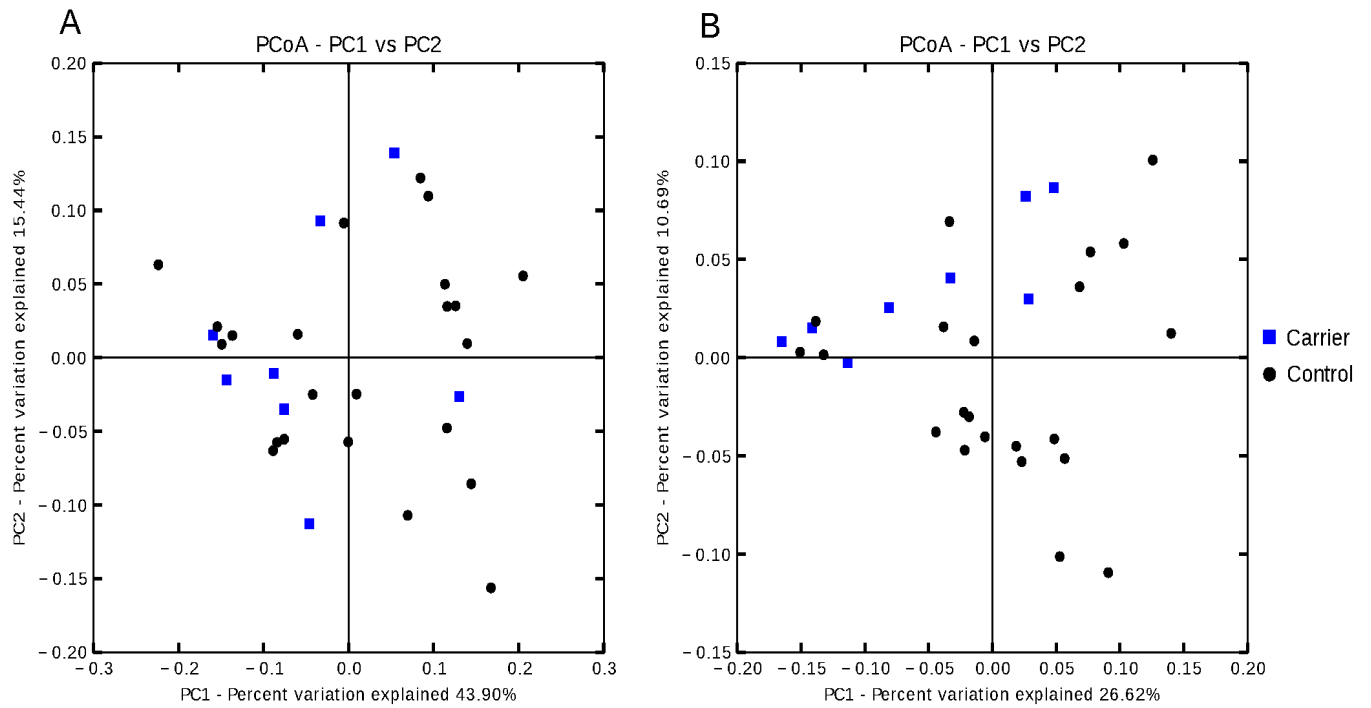

**Supplementary Figure 1.** Analysis of beta diversity. PCoA of weighted UniFrac distances among (A) total microbial communities and (B) active bacterial communities.

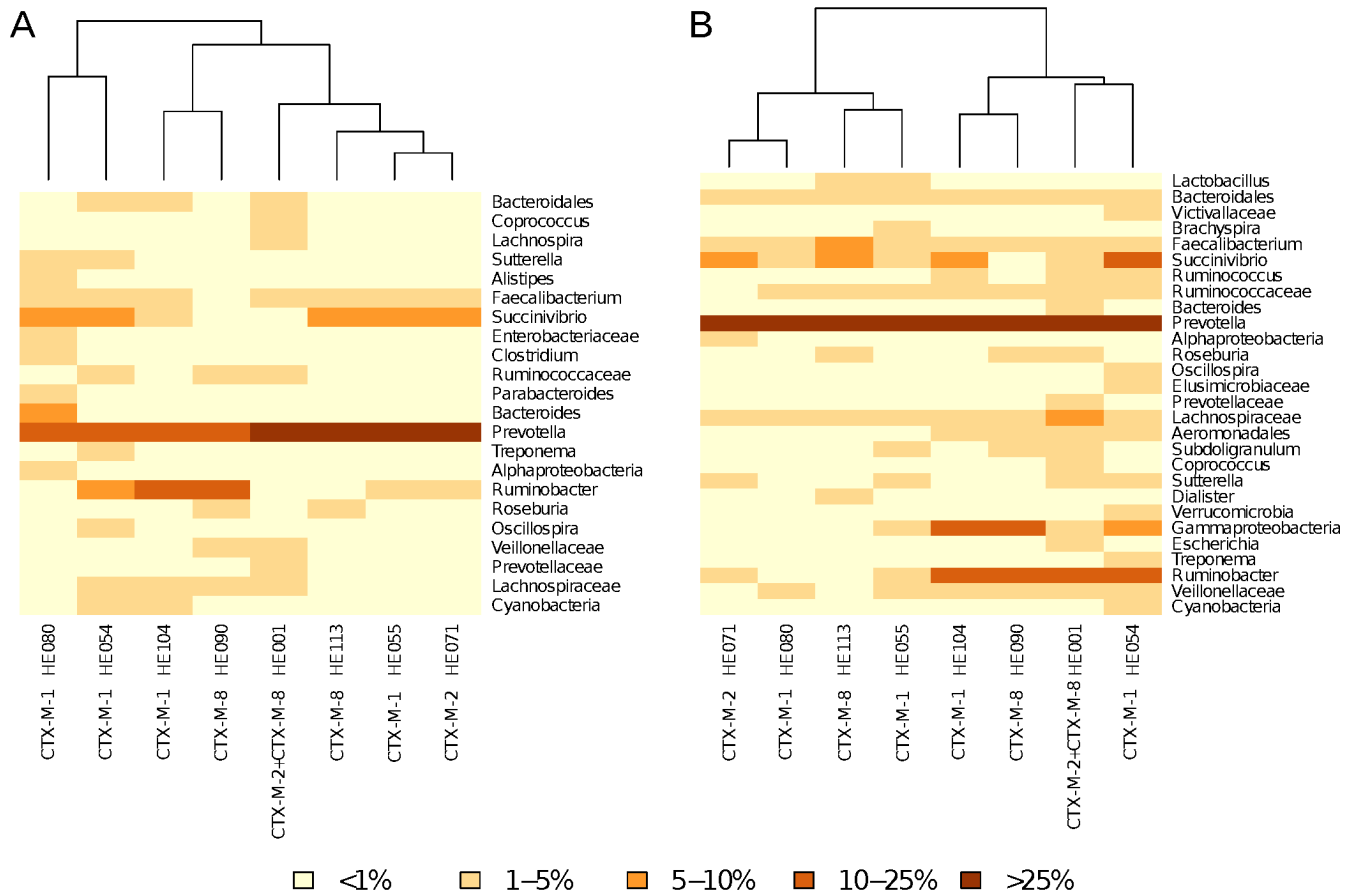

**Supplementary Figure 2.** Relationship between bacterial composition and CTX-M gene for the carrier individuals. Heat maps of (A) total microbiota and (B) active microbiota. The CTX-M gene carried by each individual is shown with the name of the sample. Colours in the figure depict the percentage range of sequences assigned to main taxa (abundance >1% in at least one sample).
